# Supplementary material for: Triboelectric Characterization of Colloidal TiO2 for Energy Harvesting Applications
Source: PubMed Central journal article supplement (PMC7353336; doi:10.3390/nano10061181), 2020-06-17

## SUPPORTING INFORMATION

# Triboelectric Characterization of Colloidal TiO<sub>2</sub> for Energy Harvesting Applications

Erik Garofalo <sup>1,2</sup>, Luca Cecchini <sup>2</sup>, Matteo Bevione <sup>1</sup> and Alessandro Chiolerio <sup>1,\*</sup>

<sup>1</sup> Istituto Italiano di Tecnologia, Center for Sustainable Future Technologies, Via Livorno 60, 10144 Torino, Italy; erik.garofalo@iit.it (E.G.); matteo.bevione@iit.it (M.B.)

<sup>2</sup> Politecnico di Torino, Department of Electronics and Telecommunications, Corso Duca degli Abruzzi 24, 10129 Torino, Italy; lucacecchini26@gmail.com

\* Correspondence: alessandro.chiolerio@iit.it

**Content:** This file contains raw measurements used to extract data shown in Figure 6. For all materials investigated (DIW and TiO<sub>2</sub> suspensions at 0.5 and 1.0 wt.%), curves were taken at a fluid velocity of 3.4 cm/s.

Triboelectricity of DIW in a FEP pipe is shown in Figure S1.

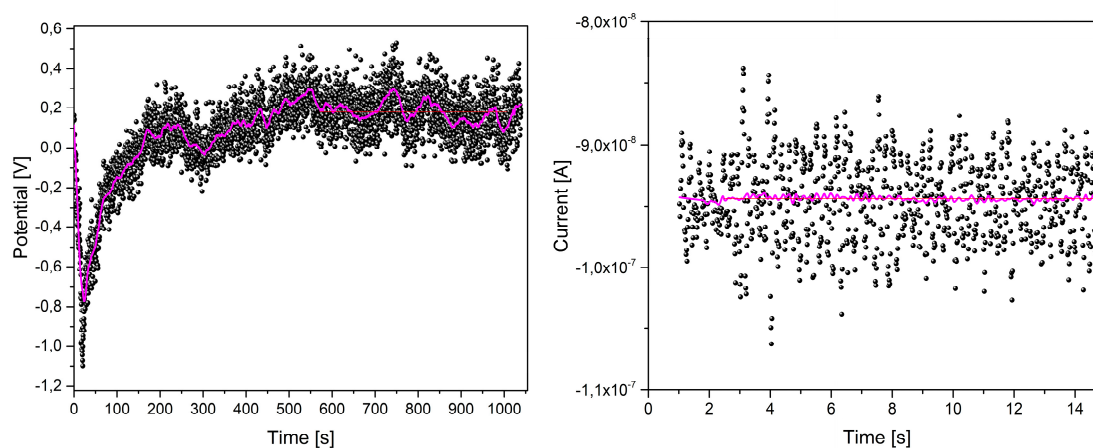

**Figure S1.** Open-circuit voltage (left) and short-circuit current (right) characterization of DIW.

Triboelectricity of 0.5 wt.% TiO<sub>2</sub> suspension in a FEP pipe is shown in Figure S2.

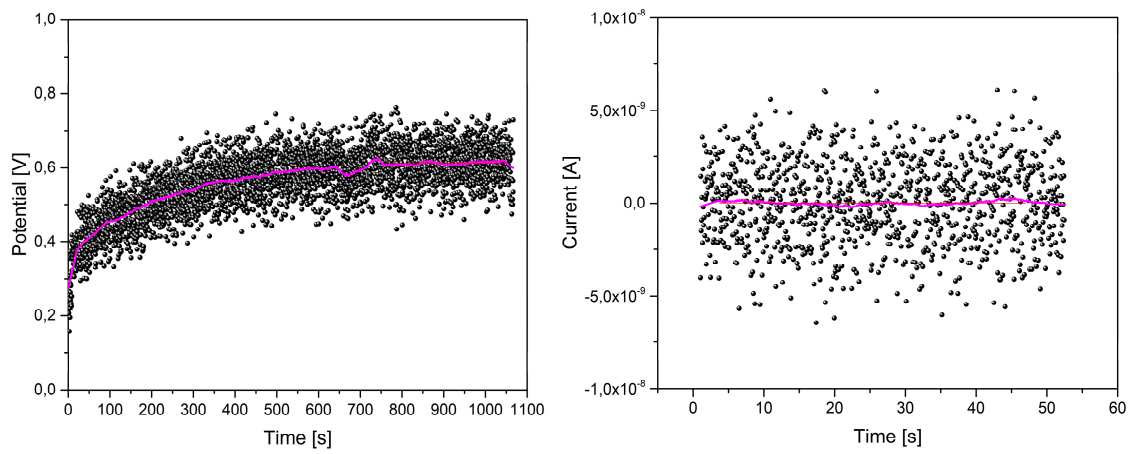

**Figure S2.** Open-circuit voltage (left) and short-circuit current (right) characterization of 0.5 wt.% TiO<sub>2</sub> suspension.

Triboelectricity of 1.0 wt.% TiO<sub>2</sub> suspension in a FEP pipe is shown in Figure S3.

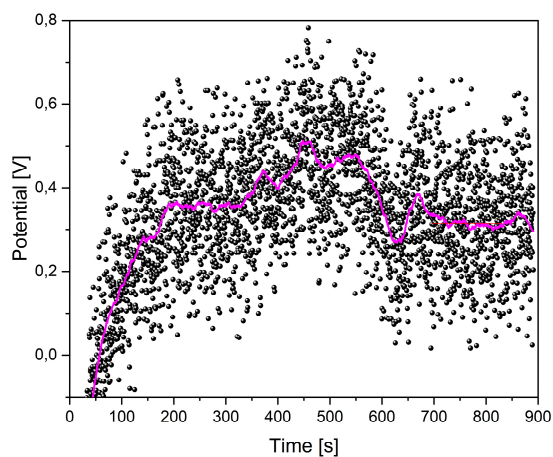

**Figure S3.** Open-circuit voltage (left) and short-circuit current (right) characterization of 1.0 wt.% TiO<sub>2</sub> suspension.

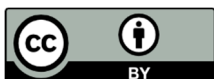

Supplement: nanomaterials-10-01181-s001.pdf [file nanomaterials-10-01181-s001.pdf]
